# Supplementary material
Source: Springer Nature journal article supplement (https://www.springermedizin.de/resource/supplementary/12885_2010_2674_MOESM2_ESM.pdf/9461692)
Supplement: MOESM2 [file 9461692]

| <b>Table. Genotype and therapeutic response</b>                                                                                                                                                                                                                                                |                         |           |               |          |
|------------------------------------------------------------------------------------------------------------------------------------------------------------------------------------------------------------------------------------------------------------------------------------------------|-------------------------|-----------|---------------|----------|
| <b>SNP and Genotype<sup>a</sup></b>                                                                                                                                                                                                                                                            | <b>No pCR/pCR (No.)</b> | <b>OR</b> | <b>95% CI</b> | <b>p</b> |
| <i>XRCC1</i> Arg399Gln (rs25487)<br>AA or AG<br>GG                                                                                                                                                                                                                                             | 29/2<br>21/8            | 5.37      | 0.94 – 57.0   | 0.062    |
| <i>XRCC2</i> 5' flank (rs6464268)<br>GG or GA<br>AA                                                                                                                                                                                                                                            | 13/4<br>37/6            | 0.53      | 0.11 – 2.99   | 0.59     |
| <i>ERCC1</i> 3' flank (rs3212986)<br>GT or TT<br>GG                                                                                                                                                                                                                                            | 17/5<br>33/5            | 0.52      | 0.10 – 2.60   | 0.54     |
| <i>XPD</i> Lys751Gln (rs13181)<br>GG or GT<br>TT                                                                                                                                                                                                                                               | 30/7<br>20/3            | 0.64      | 0.10 – 3.3    | 0.83     |
| <i>XPD</i> Asp312Asn (rs1799793)<br>AA or AG<br>GG                                                                                                                                                                                                                                             | 28/7<br>22/3            | 0.55      | 0.082 – 2.77  | 0.65     |
| <p><b>SNP</b>, single nucleotide polymorphism; <b>pCR</b>, complete pathologic response; <b>OR</b>, odds ratio for non-pCR; <b>CI</b>, confidence interval.</p> <p><sup>a</sup> For each SNP, the variant allele homozygote and heterozygote are listed above the major allele homozygote.</p> |                         |           |               |          |
